# Supplementary material for: Molten salt construction of stable oxygen vacancies on TiO2 for enhancement of visible light photocatalytic activity
Source: Royal Society of Chemistry journal article supplement (doi:10.1039/c8ra07543c), 2018-01-01
Supplement: c8ra07543c1.pdf [file c8ra07543c1.pdf]

Supporting Information

## Molten salt construction of stable oxygen vacancies on TiO<sub>2</sub> for enhancement of visible light photocatalytic activity

Yu Zou,<sup>a</sup> Kaimeng Yang,<sup>a</sup> Qirong Chen,<sup>\*b</sup> Haitao Wang<sup>c</sup> and Xiangfu Meng<sup>\*a</sup>

<sup>a</sup>Department of Chemistry, Capital Normal University, Beijing 100048, P. R. China  
Department of Chemistry, Capital Normal University, Beijing 100048, China.

<sup>b</sup>Beijing Center for Physical and Chemical Analysis (BCPCA), Beijing 100089, China..

<sup>c</sup>Baxter Healthcare, 12F No989, Shanghai 200031, China.

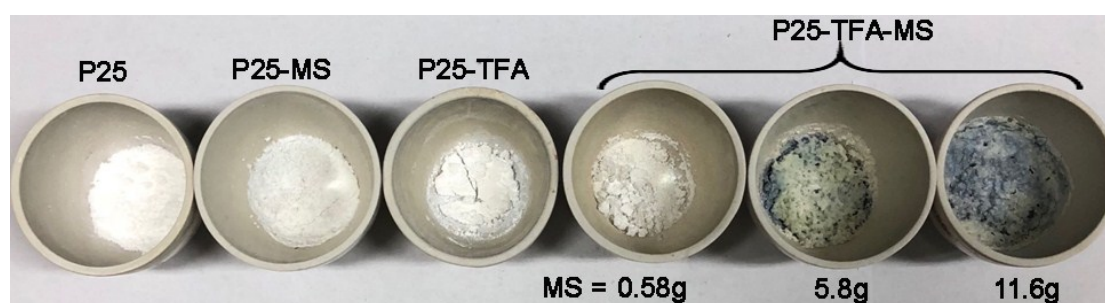

Fig. S1 Effect of MS dosages on the annealing of P25.

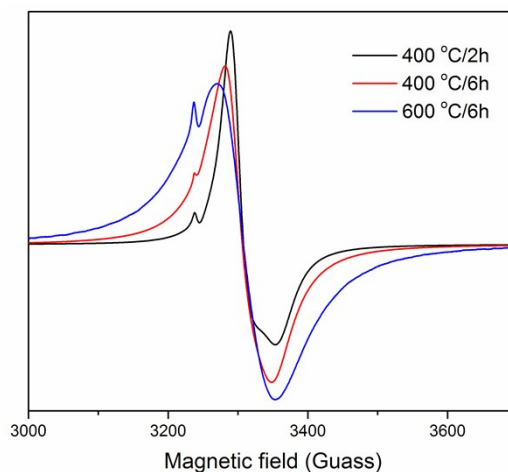

Fig.S2 X-band EPR spectra of B-TiO<sub>2</sub> synthesized with MS at different time and temperature. A longer annealing time and a higher temperature will lead to increase of the bulk Ti<sup>3+</sup> defect concentration and decrease of surface oxygen vacancy concentration.

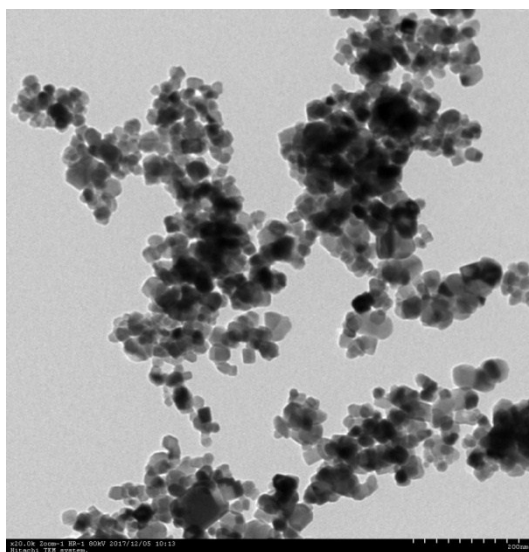

Fig. S3 TEM of  $\text{TiO}_2$  synthesized with addition of NaF via molten salt.

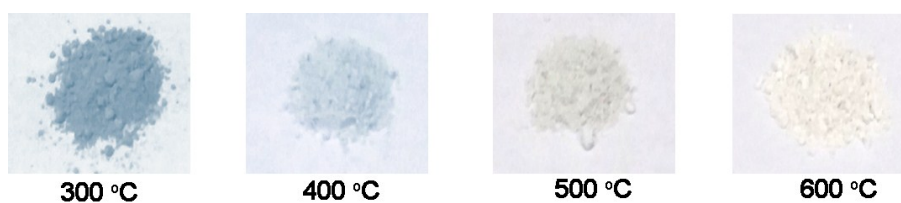

Fig. S4 Photographs of B- $\text{TiO}_2$  calcined in air at different temperature for 2h. It is found that the dark blue color fades to white gradually with increasing the calcination temperature from 300 °C to 600 °C.

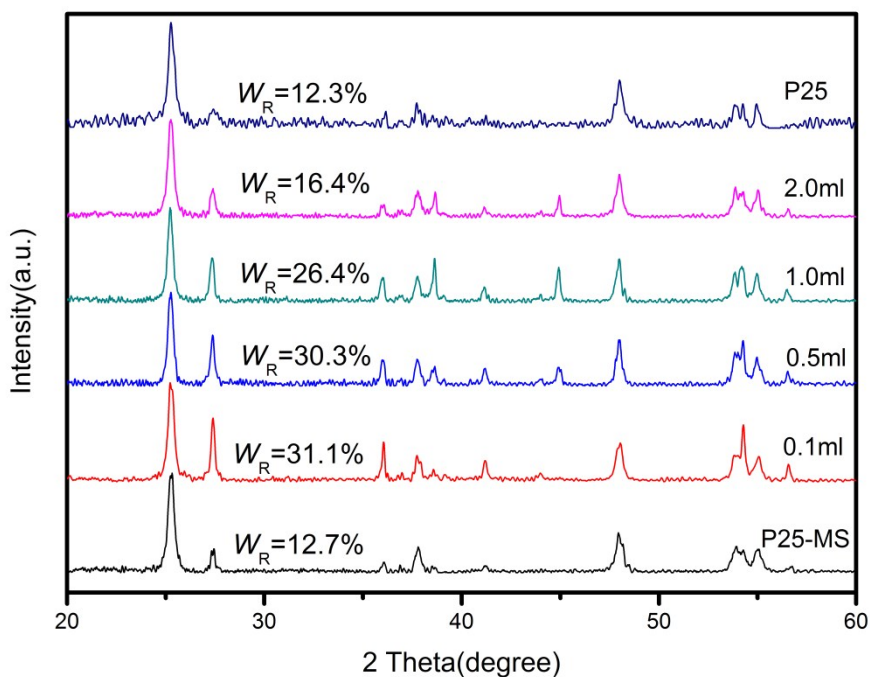

Fig. S5 XRD of  $\text{TiO}_2$  synthesized with different TFA amount via MS method.

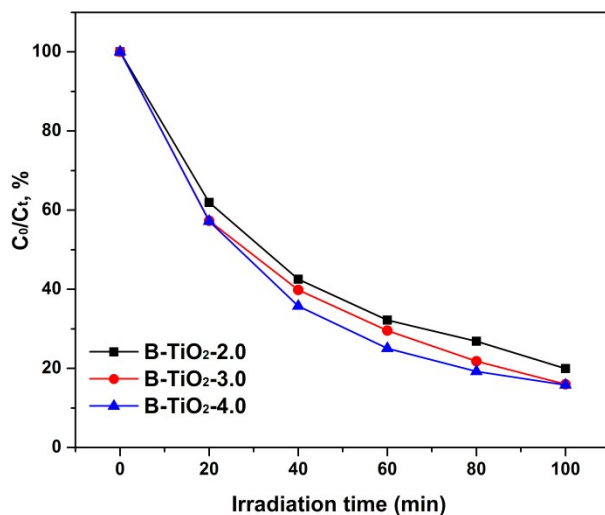

Fig. S6 Effect of TFA amount on photocatalytic activity of B-TiO<sub>2</sub>.

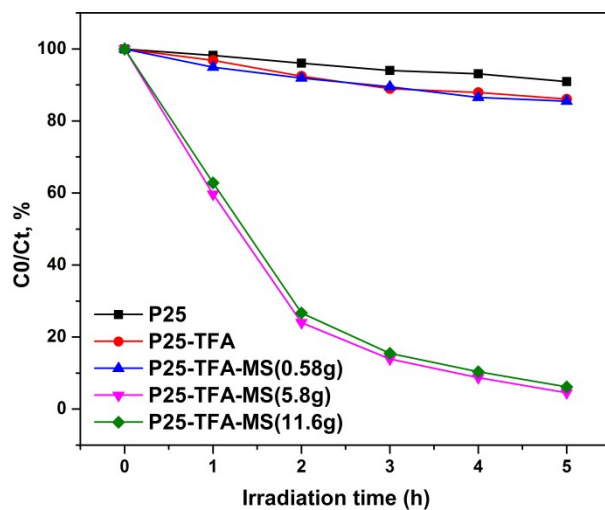

Fig. S7 Effect of molten salt dosage on photocatalytic activity.

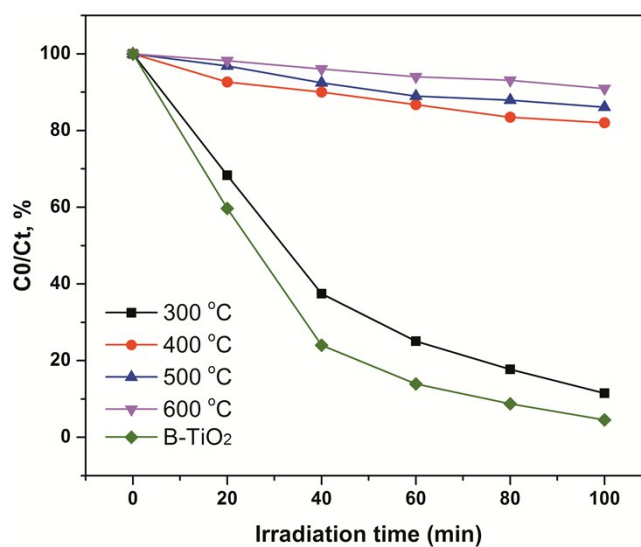

Fig. S8 Photodegradation of RhB over calcinated B-TiO<sub>2</sub> at different temperature. It is clear to see that the photocatalytic activity of calcinated B-TiO<sub>2</sub> at 300°C decreases slightly. However, the

photocatalytic activity of samples calcinated at 400°C, 500°C, and 600°C are almost vanishes.

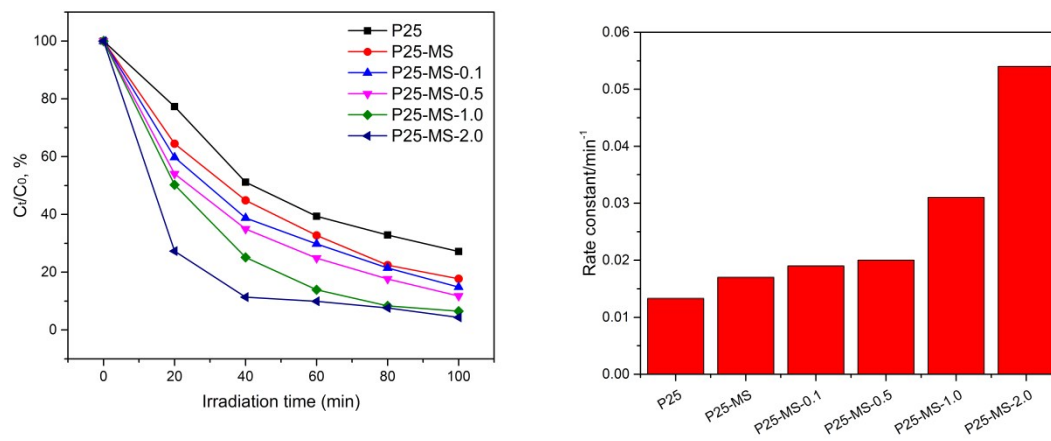

**Fig. S9** Photodegradation of RhB under full spectrum light irradiation.
